# Supplementary material for: A high refractive index resist for UV-nanoimprint soft lithography based on titanium-containing elemental polymer oligomers
Source: Royal Society of Chemistry journal article supplement (doi:10.1039/d1tc04578d), 2021-11-22
Supplement: d1tc04578d1.pdf [file d1tc04578d1.pdf]

## Supporting Information

# High Refractive Resist for UV-nanoimprint Soft Lithography Based on Titanium-containing Elemental Polymer Oligomer

*Junlun Qiu,<sup>a,c</sup> Getian Hu<sup>b</sup>, Yuqiao Wang<sup>a</sup>, Yurui Wang<sup>a</sup>, Ming Luo<sup>a\*</sup>, Xin Hu<sup>a\*</sup>*

<sup>a</sup> School of Materials Engineering, Changshu Institute of Technology, 99 South Sanhuan Road, Changshu 215500, China

<sup>b</sup> Department of Biological Sciences, Xi'an Jiaotong-Liverpool University, 111 Ren'ai Road, Suzhou 215123, China

<sup>c</sup> Department of Materials and Chemistry, Soochow University, 199 Ren'ai Road, Suzhou 215123, China

\*Email: [mingluo@cslg.edu.cn](mailto:mingluo@cslg.edu.cn); [huxin@cslg.edu.cn](mailto:huxin@cslg.edu.cn)

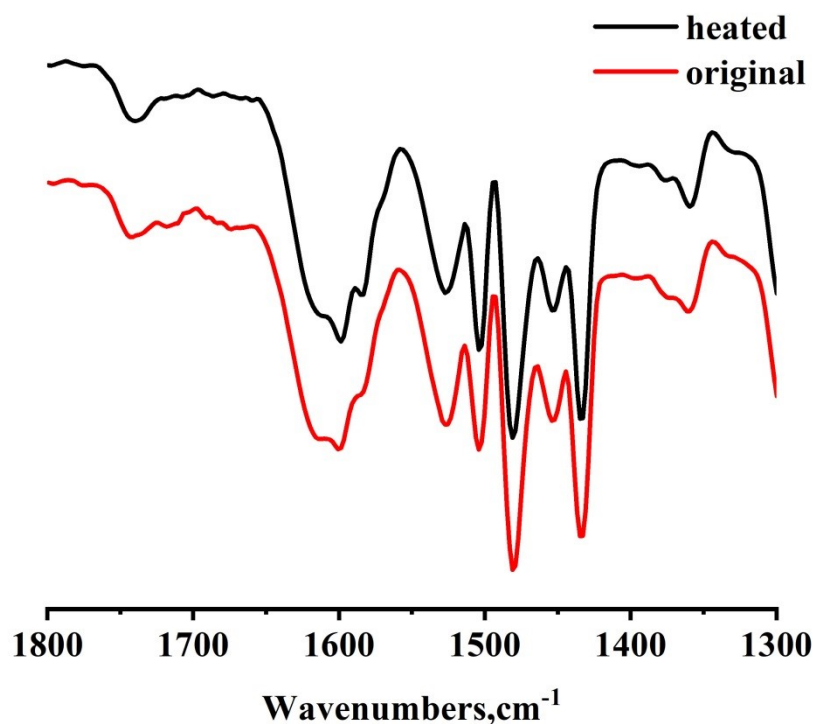

**Fig.1.** FTIR spectrum of Ti-resist films before and after heated at 80°C for 5 minutes.

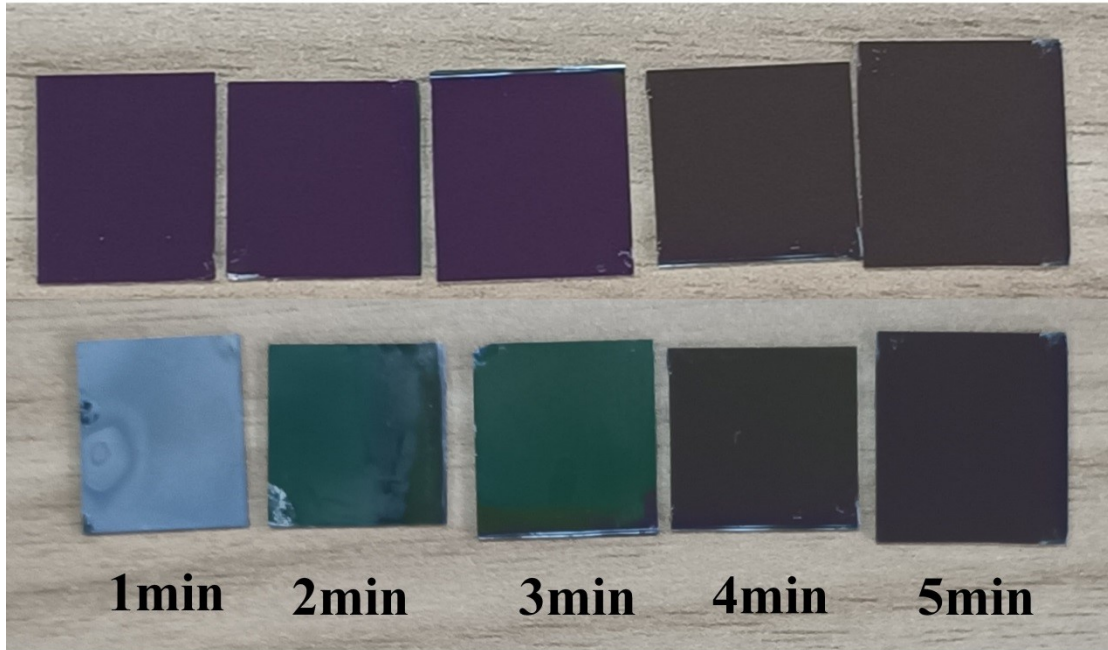

**Fig.2.** Optical images of Ti-resists films UV-cured for different time before and after acetone immerse.

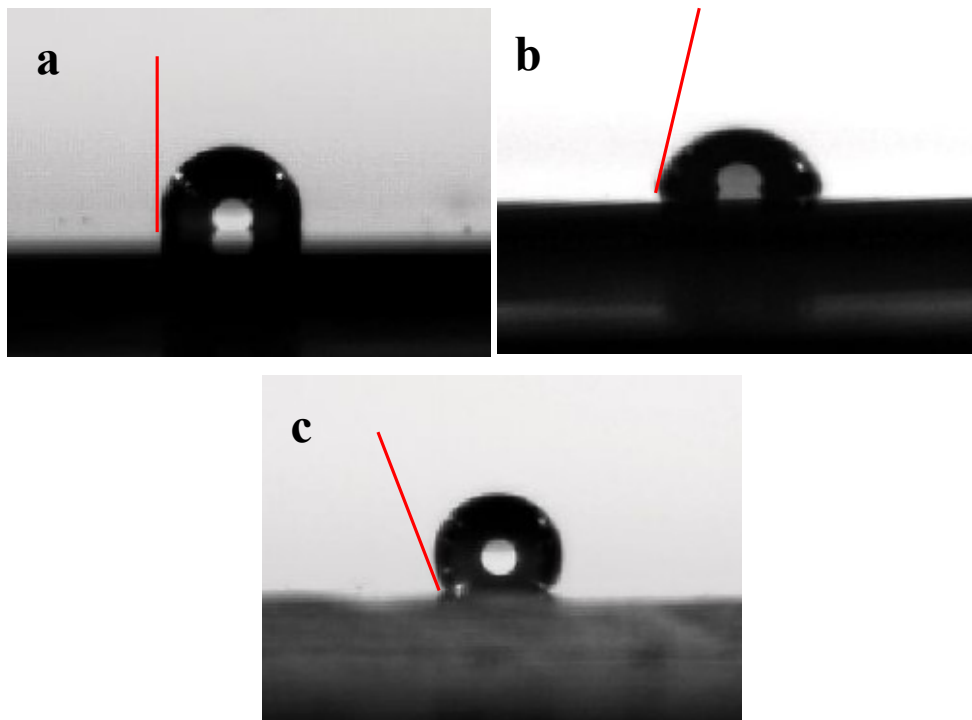

**Fig.3.** Water contact angles of a) CN975, b) Ti-resist and c) PDMS film.

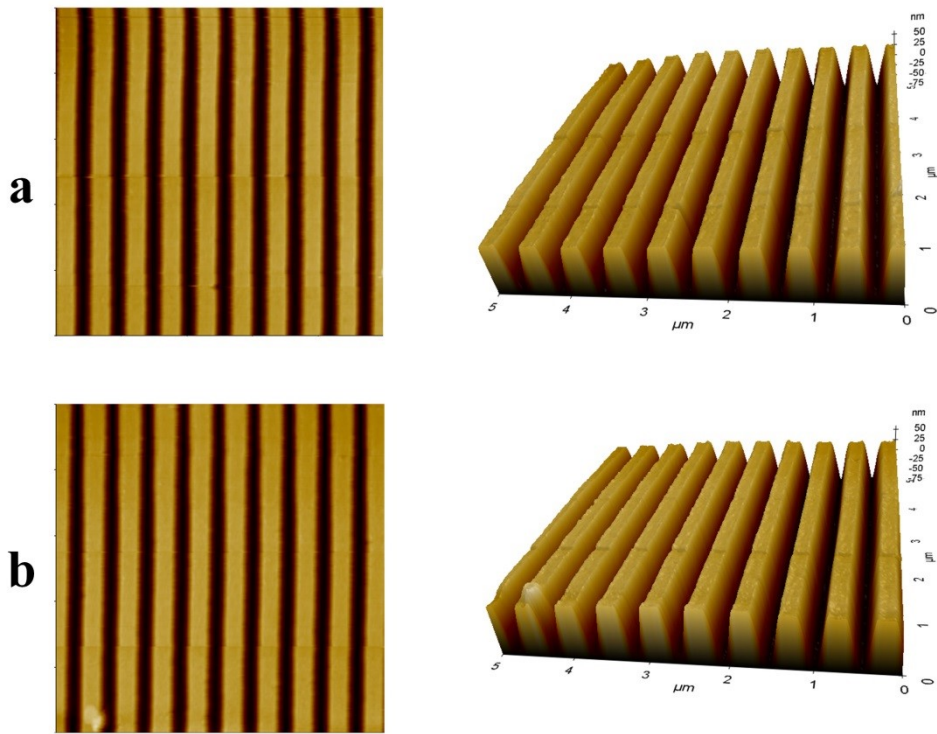

**Fig.4.** AFM images of a) 550nm pitch Zr-resist grating on Si wafer; b) 550nm pitch grating imprinted by a PDMS mold using a) as the master.
